# Supplementary material for: Molecular characterization of a novel rhabdovirus infecting blackcurrant identified by high-throughput sequencing
Source: Springer Nature journal article supplement (doi:10.1007/s00705-018-3709-x), 2018-01-24
Supplement: MOESM3 [file 15412172]

**Supplementary Table 1** Primers used for determination of the BCaRV genome

| Primer | Sequence (5' to 3') | Amplicon size (bp) |
| --- | --- | --- |
| hC812_5endr2 | TGTTGAGCTGGTCATTGCAC | 500 |
| hC812_5endr1 | AGTAGTAGGAGGTACGACAG | 730 |
| hC812f1 | ACCGTCTGGACAATGTCCATACC | 1,300 |
| hC812r1 | AGTAGGAGCACGCTTGACAGG |  |
| hC812f2 | AGCAGGAAACCCCAGCTTGC | 1,070 |
| hC812r2 | TGCATCATCTTGCCATATATCAGG |  |
| hC812f3 | ATGGAAACAGATGCACCTGCC | 1,390 |
| hC812r3 | TCCCACTCCATAGATGTCTTCC |  |
| hC812f4 | AGTAACGTAGACCAGACGCTAG | 1,350 |
| hC812r4 | ACCCTCCAATACCCCTTGATC |  |
| hC812f5 | ACCGTTCGGATCTTCTTCTGACG | 1,278 |
| hC812r5 | TGTGCTTTGTTCCTGTTGTTGG |  |
| hC812f6 | ACAATCATGTGCATCACAGATG | 1,140 |
| hC812r6 | AGCACCATGCGCTATCTCTTC |  |
| hC812f7 | TGGTTCTCCAAAGTCAAACTCG | 1,400 |
| hC812r7 | ATGTCTGGTAGCTCTACTGTAC |  |
| hC812f8 | TGACGGAGTTCTTCCAAGGAG | 1,410 |
| hC812r8 | GACATGAGTGAGAAGAATCTAGC |  |
| hC812f9 | TCGTGAAAGGAACTCAGTGTTTG | 1,370 |
| hC812r9 | TCACTAAGAGGATCAGGGAACC |  |
| hC812f10 | TCTGTAGATAATCTGAACAAGGG | 1,330 |
| hC812r10 | AGCAGTGTTGTCATCATACTCG |  |
| hC812f11 | AGATGTAGAGCATAGATACCATG | 1,380 |
| hC812r11 | ACAGCCTGAGCAGTAGACAC |  |
| hC812f12 | ACGAGAATGAGATGTGAGTGG | 1,310 |
| hC812r12 | AGAGAGCCAAGGTGGAGGTC |  |
| hC812_3endf1 | ATACACGTGAGATGGCAGATC | 570 |
| hC812_3endf2 | ACTAGTGCATCATTTGACCAGG | 430 |
